# Supplementary material for: Hierarchical ordered macro/mesoporous titania with a highly interconnected porous structure for efficient photocatalysis
Source: Royal Society of Chemistry journal article supplement (doi:10.1039/c6ta06849a), 2016-01-01
Supplement: c6ta06849a1.pdf [file c6ta06849a1.pdf]

Electronic Supplementary Information

## **Hierarchical Ordered Macro/mesoporous Titania with Highly Interconnected Porous Structure for Efficient Photocatalysis**

Tao Zhao<sup>a</sup>, Yuan Ren<sup>b</sup>, Jianping Yang<sup>a</sup>, Lianjun Wang<sup>a</sup>, Wan Jiang<sup>a</sup>, Ahmed A. Elzatahry<sup>e</sup>, Abdulaziz Alghamdi<sup>f</sup>, Yonghui Deng<sup>b,d</sup>, Dongyuan Zhao<sup>b</sup>, Wei Luo<sup>a,c,\*</sup>

<sup>a</sup>State Key Laboratory for Modification of Chemical Fibers and Polymer Materials, College of Materials Science and Engineering, Donghua University, Shanghai 201620, P. R. China.

<sup>b</sup>Department of Chemistry, State Key Laboratory of Molecular Engineering of Polymers, iChEM, Shanghai Key Laboratory of Molecular Catalysis and Innovative Materials, Fudan University, Shanghai 200433, P. R. China.

<sup>c</sup>State Key Laboratory of High Performance Ceramics and Superfine Microstructure, Shanghai Institute of Ceramics, Chinese Academy of Sciences, Shanghai 200050, P. R. China

<sup>d</sup>State Key Lab of Transducer Technology, Shanghai Institute of Microsystem and Information Technology, Chinese Academy of Sciences, Shanghai 200050, P. R. China

<sup>e</sup>Materials Science and Technology Program, College of Arts and Sciences, Qatar University, PO Box 2713, Doha, Qatar

<sup>f</sup>Department of Chemistry, College of Science, King Saud University, Riyadh 11451, Saudi Arabia

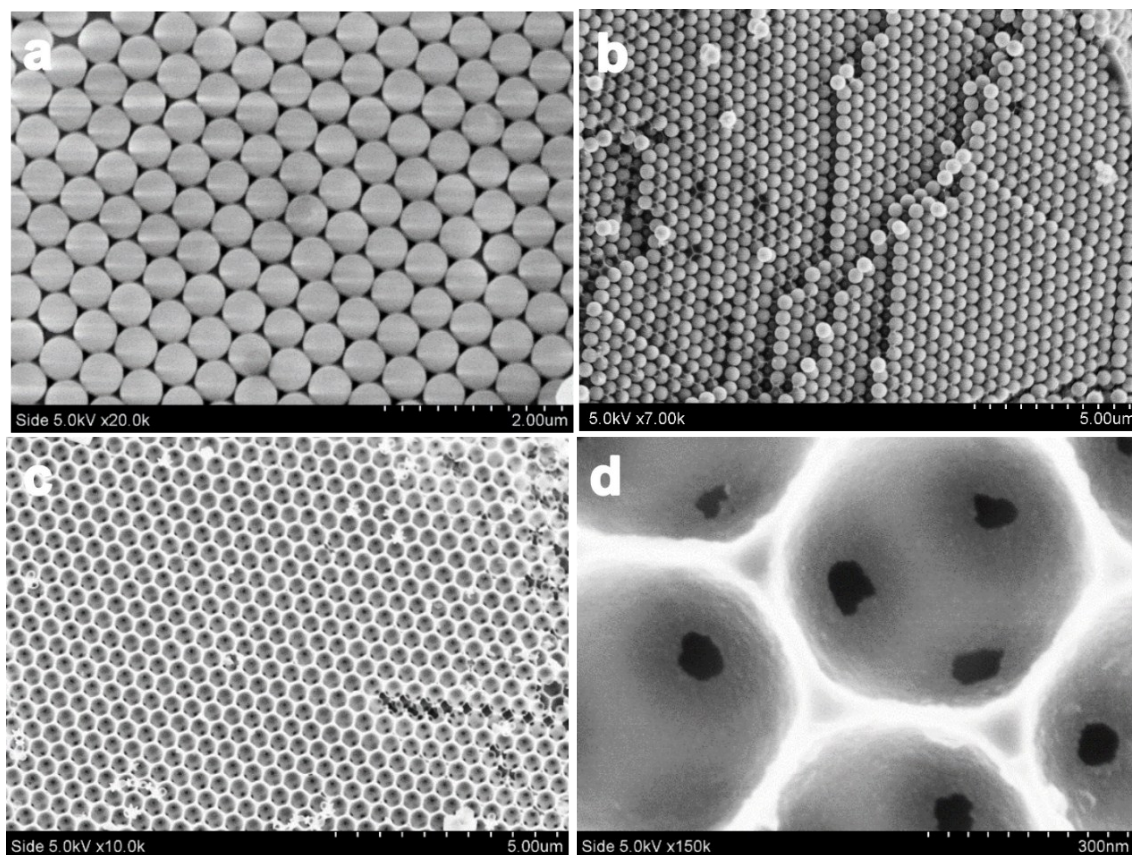

**Figure S1.** SEM images of (a)  $\text{SiO}_2$  colloidal crystal arrays using uniform silica spheres of  $\sim 480$  nm, (b)  $\text{SiO}_2$  colloidal crystal impregnated with phenolic resin, (c) the 3-D ordered macroporous carbon (3DOMC) obtained after HF etching, (d) the corresponding magnified FESEM image of c.

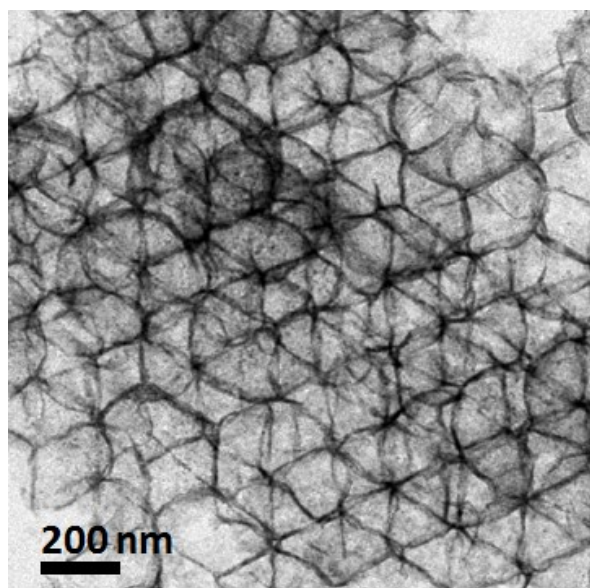

**Figure S2.** TEM image of HOPT viewed along the (111) plane

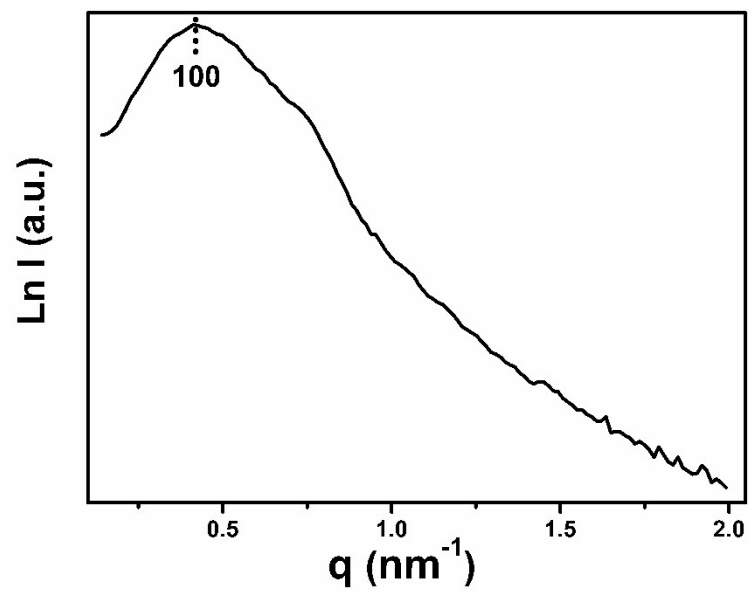

**Figure S3.** SAXS pattern of the HOPT, indicating an ordered mesosturcutre.

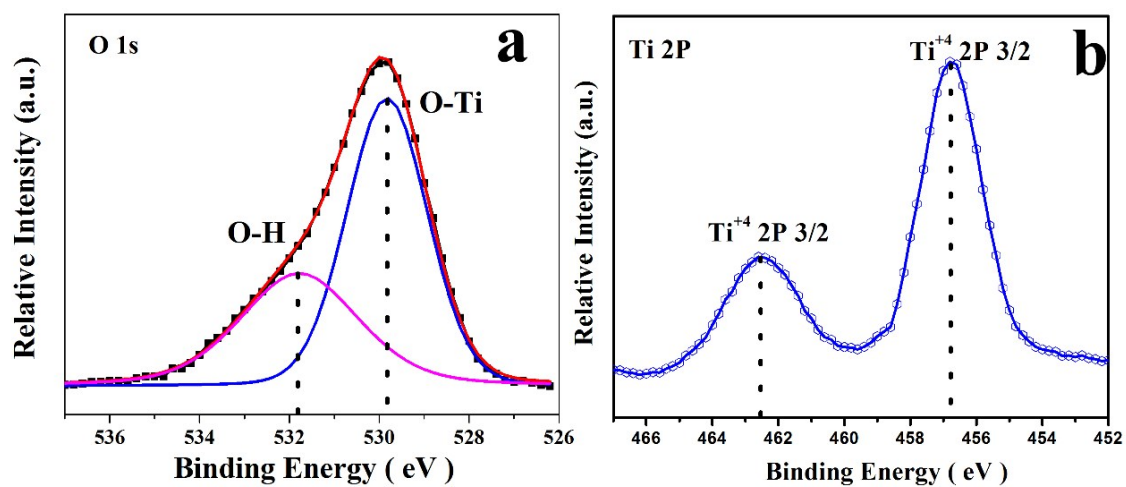

**Figure S4.** XPS core-level spectra of O1s (a) and Ti2p (b) for the HOPT.

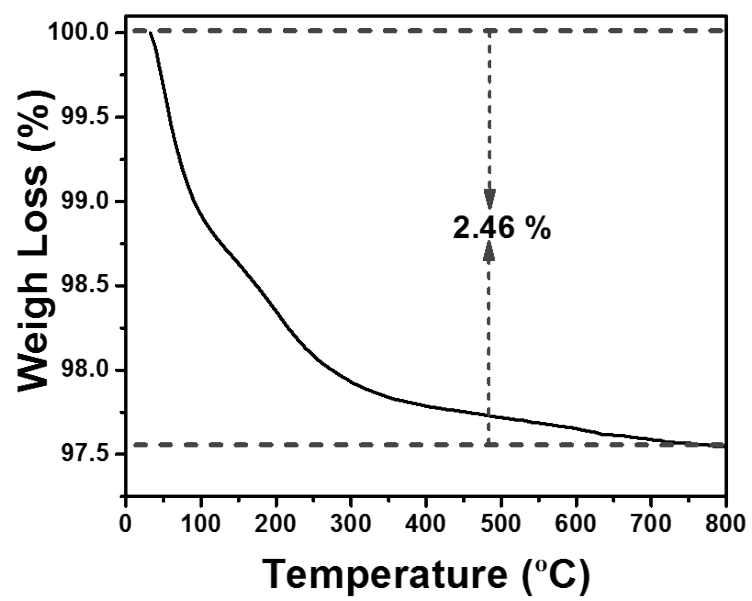

**Figure S5.** TGA curve of the HOPT materials

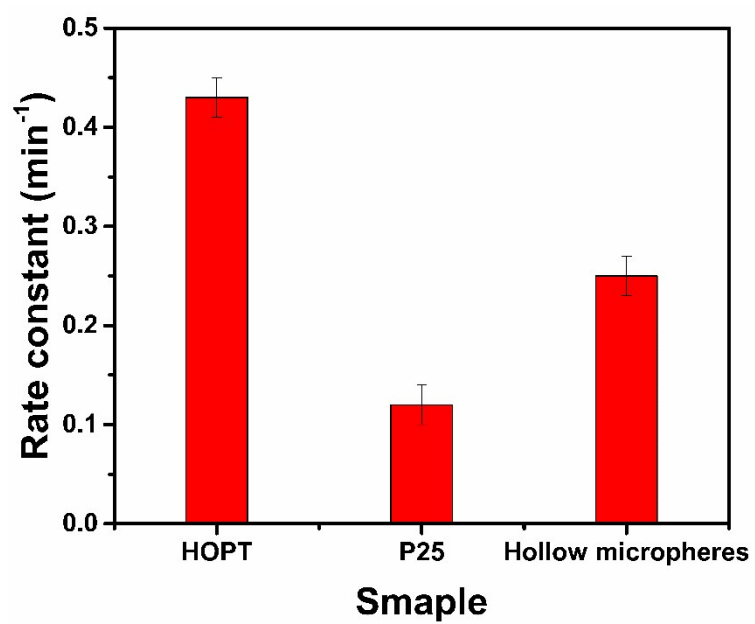

**Figure S6.** Comparison of the photocatalytic activity of HOPT, P25 and TiO<sub>2</sub> hollow microspheres samples for the photocatalytic degradation of RhB in aqueous solutions.

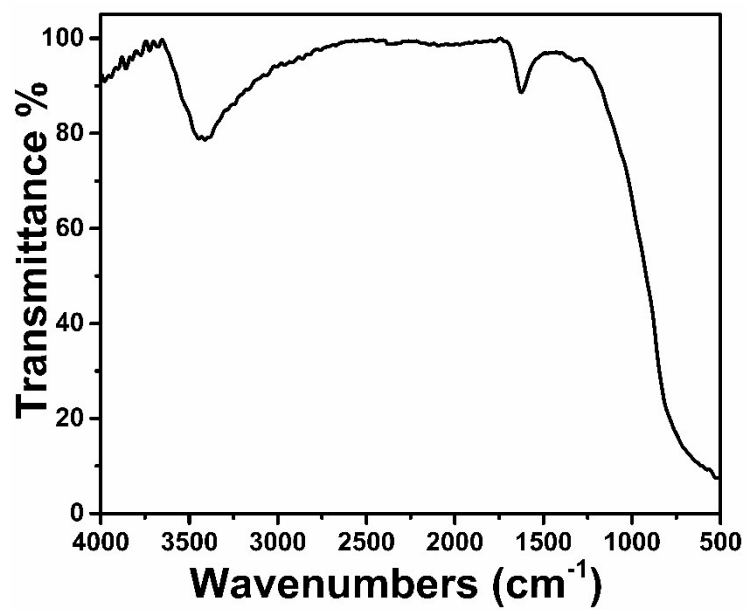

**Figure S7.** The *in-situ* Fourier transform infrared spectroscopy analysis of HOPT after photocatalysis. It indicates that no organic species were retained in the photocatalysts after catalysis.



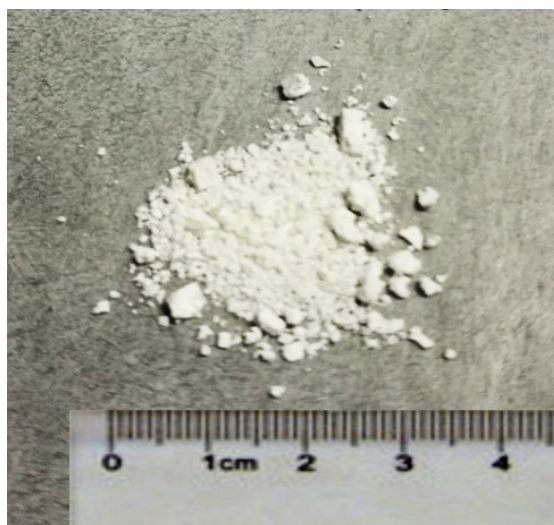

**Figure S8.** The photo image of the HOPT after photocatalysis. It indicates that the recycled HOPT is the same with the pristine sample in appearance, indicating a complete degradation of RhB solutions.

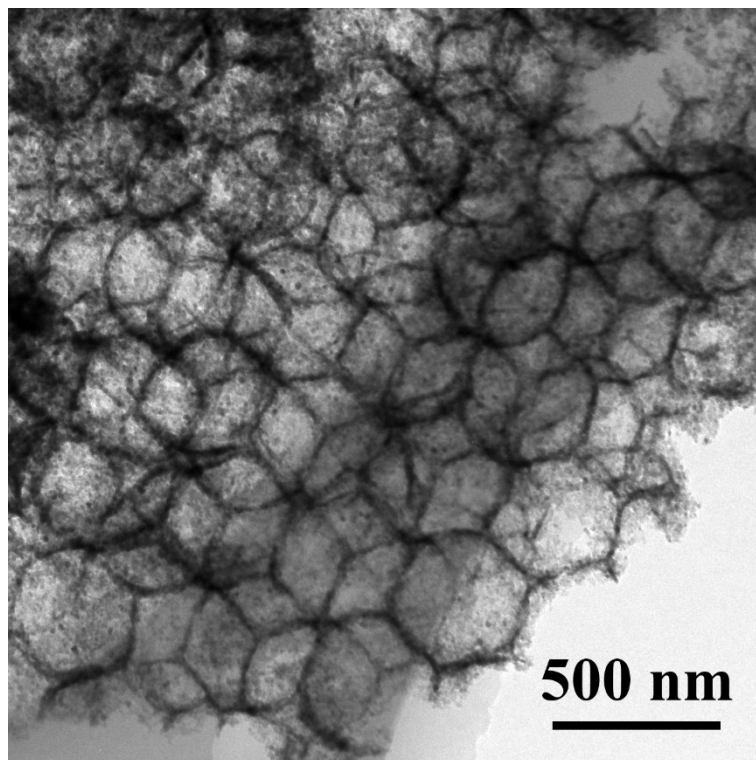

**Figure S9.** TEM image of HOPT after degradation of RhB.

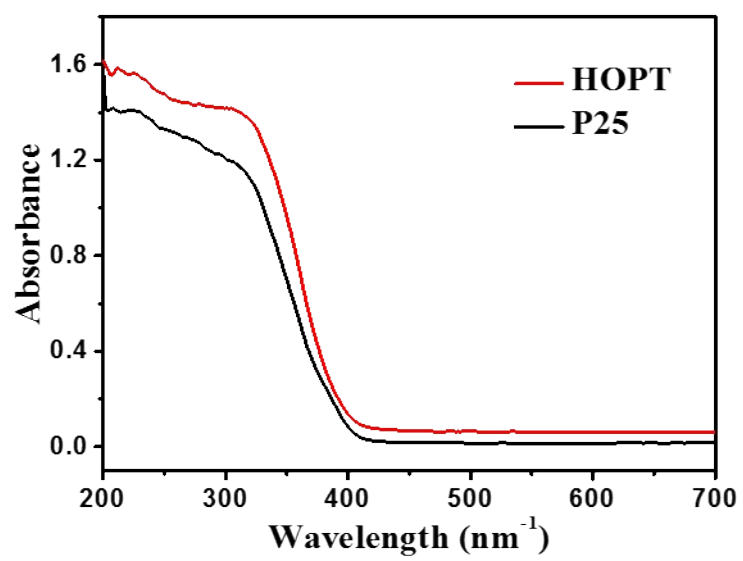

**Figure S10.** The UV-vis absorption spectra of HOPT and P25
